# Supplementary material for: Dynamic Changes and Clinical Significance of Gut Microbiota and Serum Metabolites in Breast Cancer Onset, Progression and Chemotherapy Intervention
Source: Research Square preprint supplement (doi:10.21203/rs.3.rs-8449881/v1), 2026-02-23
Supplement: Supplementary file 1 [file 146bf1ba9a85cd865ec8ef3b.docx]

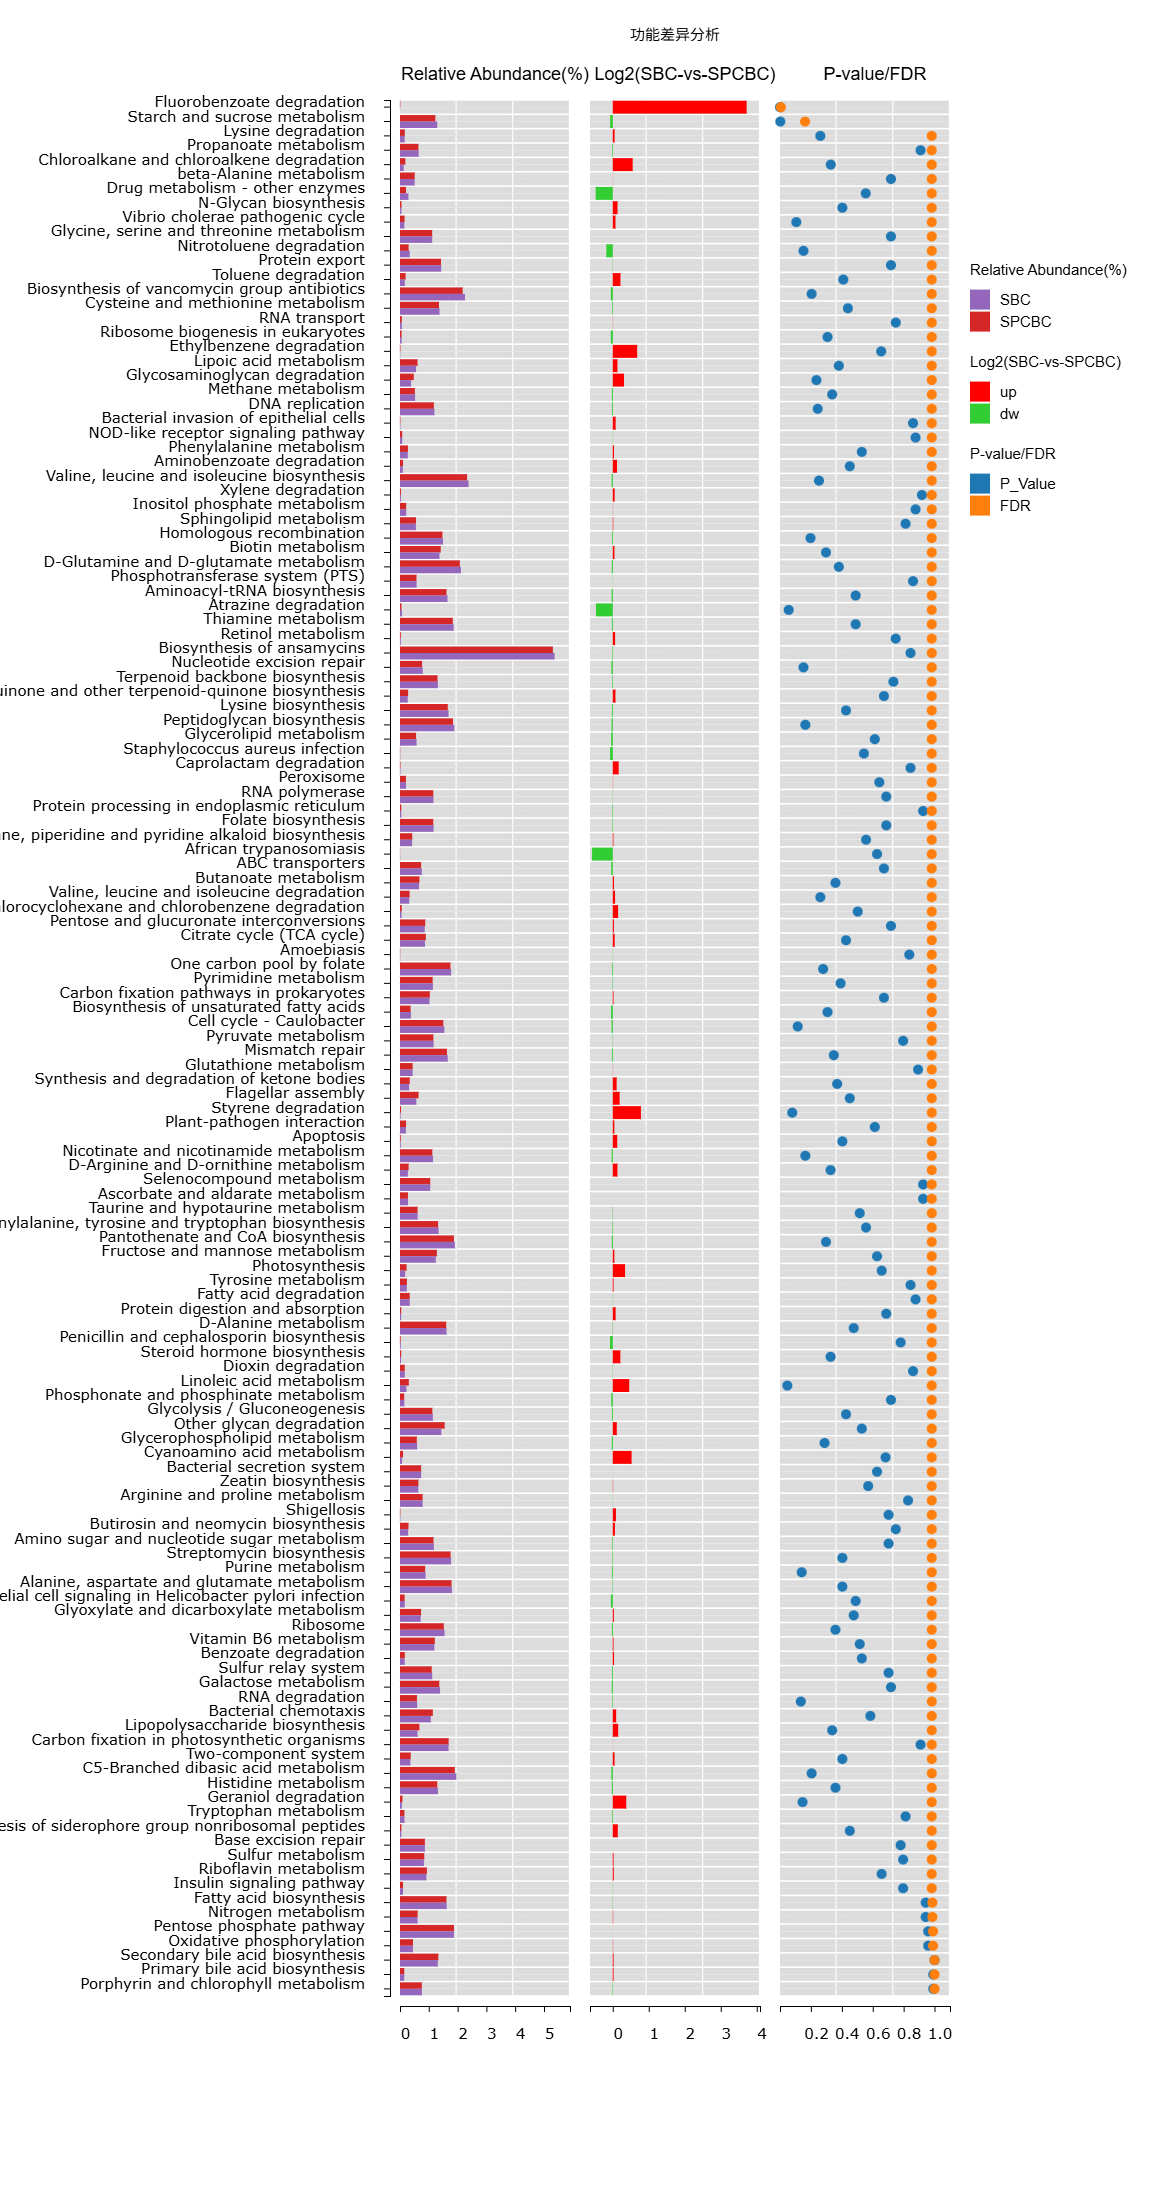


**Supplementary Figures 2.** Bar plots of the relative abundances of KEGG level 3 functional categories.
