# Supplementary material for: Dynamic Changes and Clinical Significance of Gut Microbiota and Serum Metabolites in Breast Cancer Onset, Progression and Chemotherapy Intervention
Source: Research Square preprint supplement (doi:10.21203/rs.3.rs-8449881/v1), 2026-02-23
Supplement: Supplementary file 2 [file dbc9c2066b6ac8f1209997a5.docx]

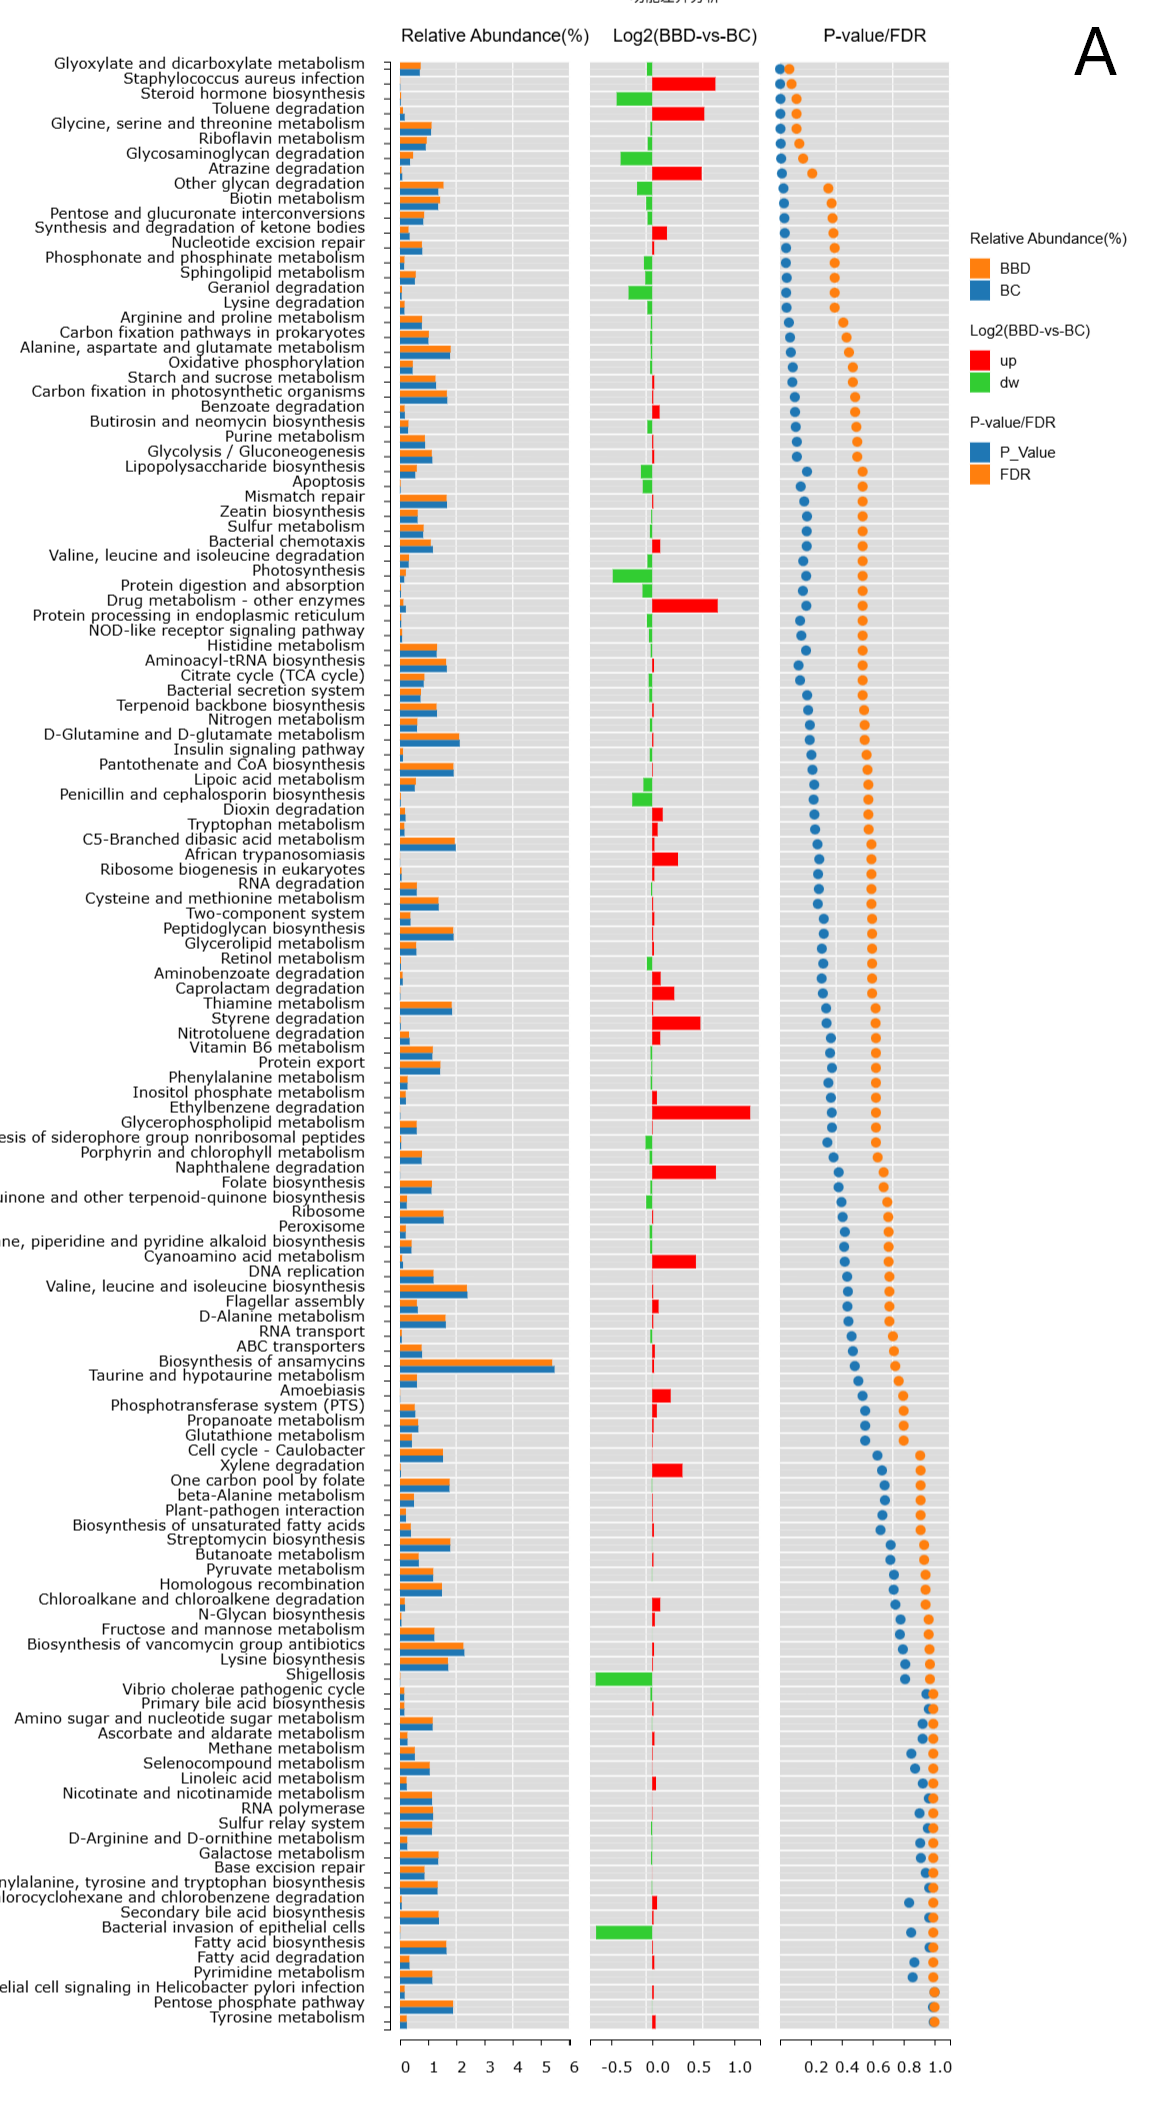


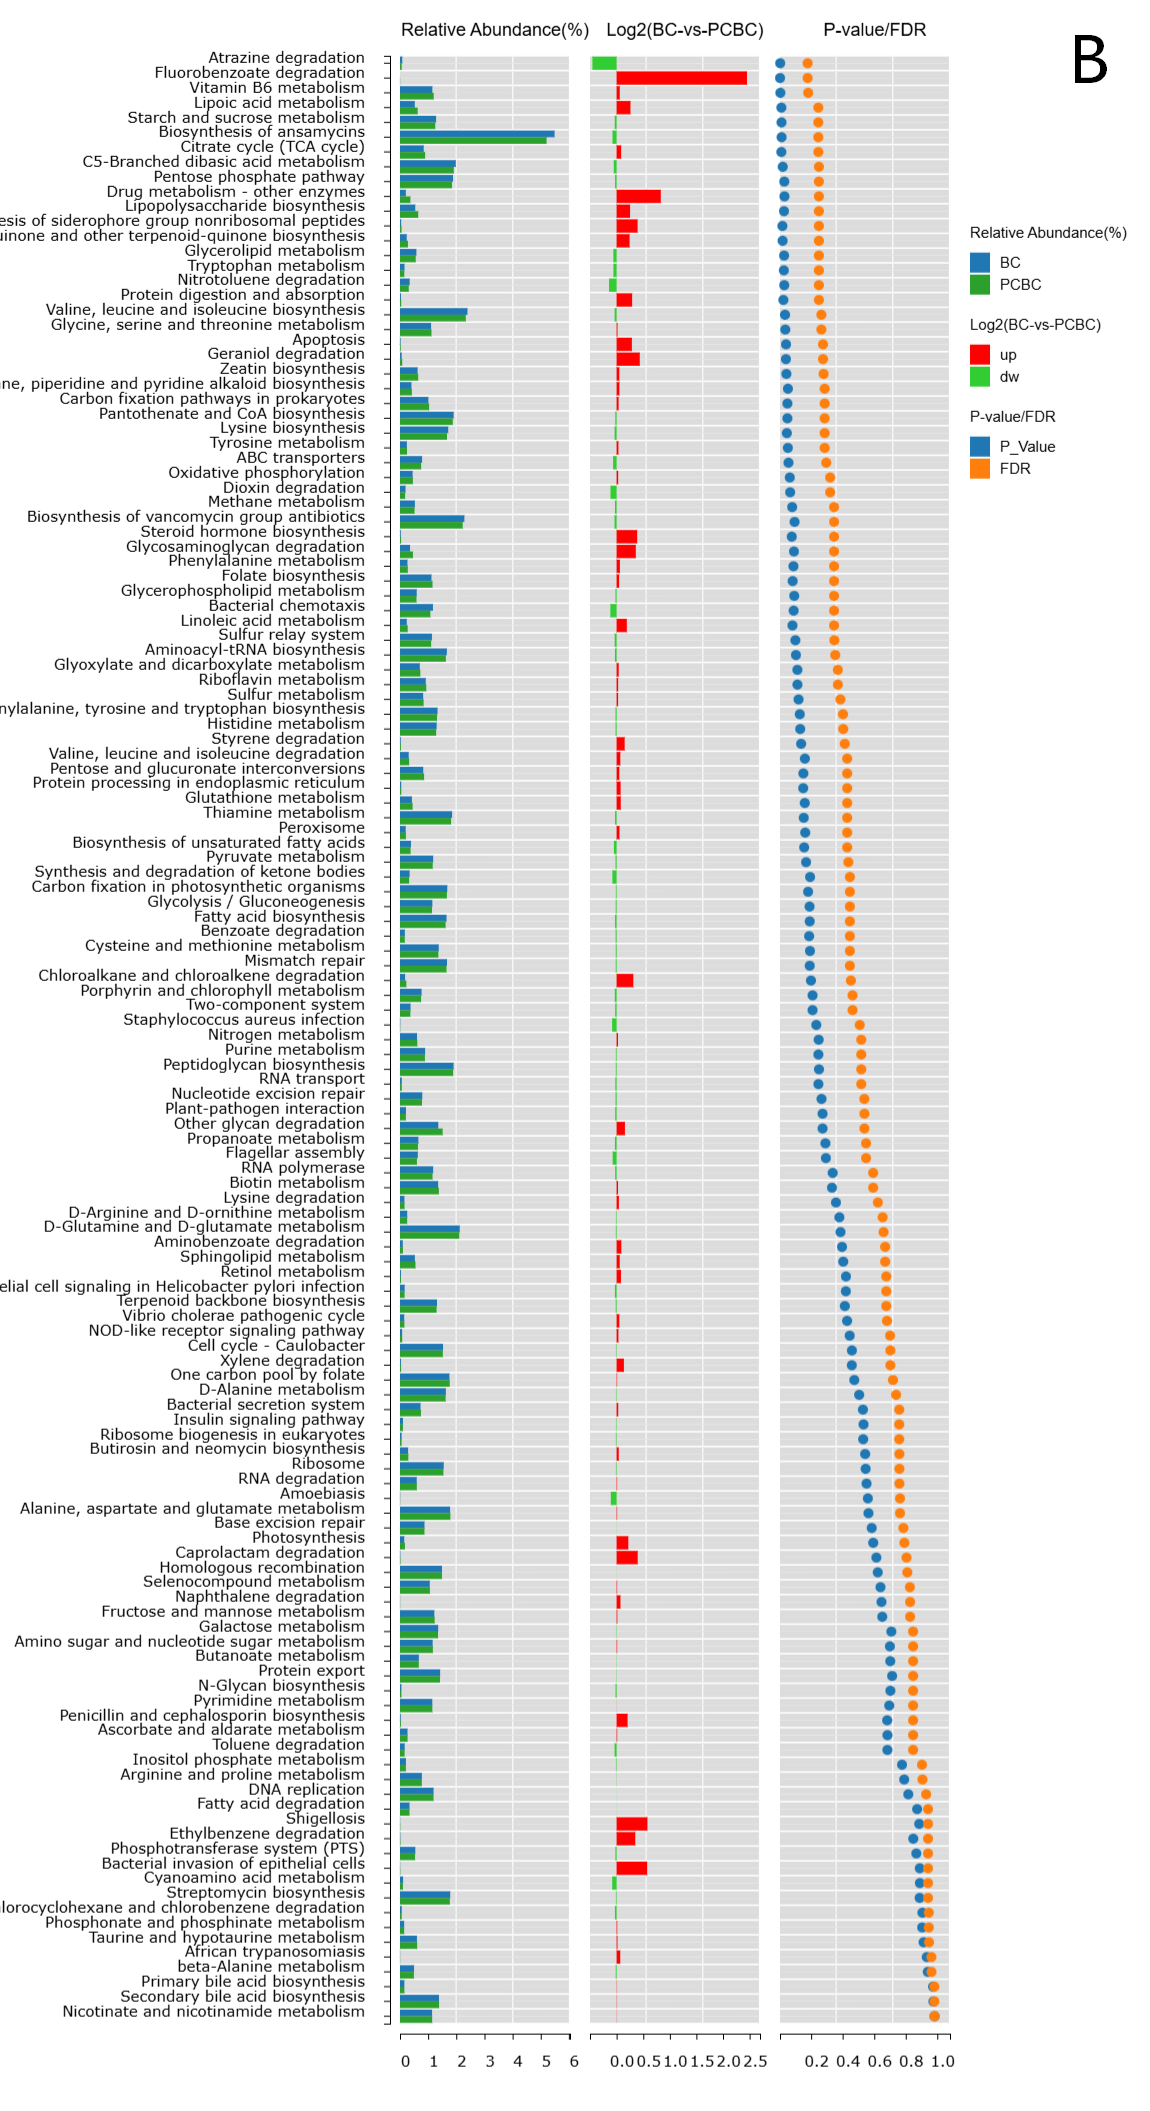


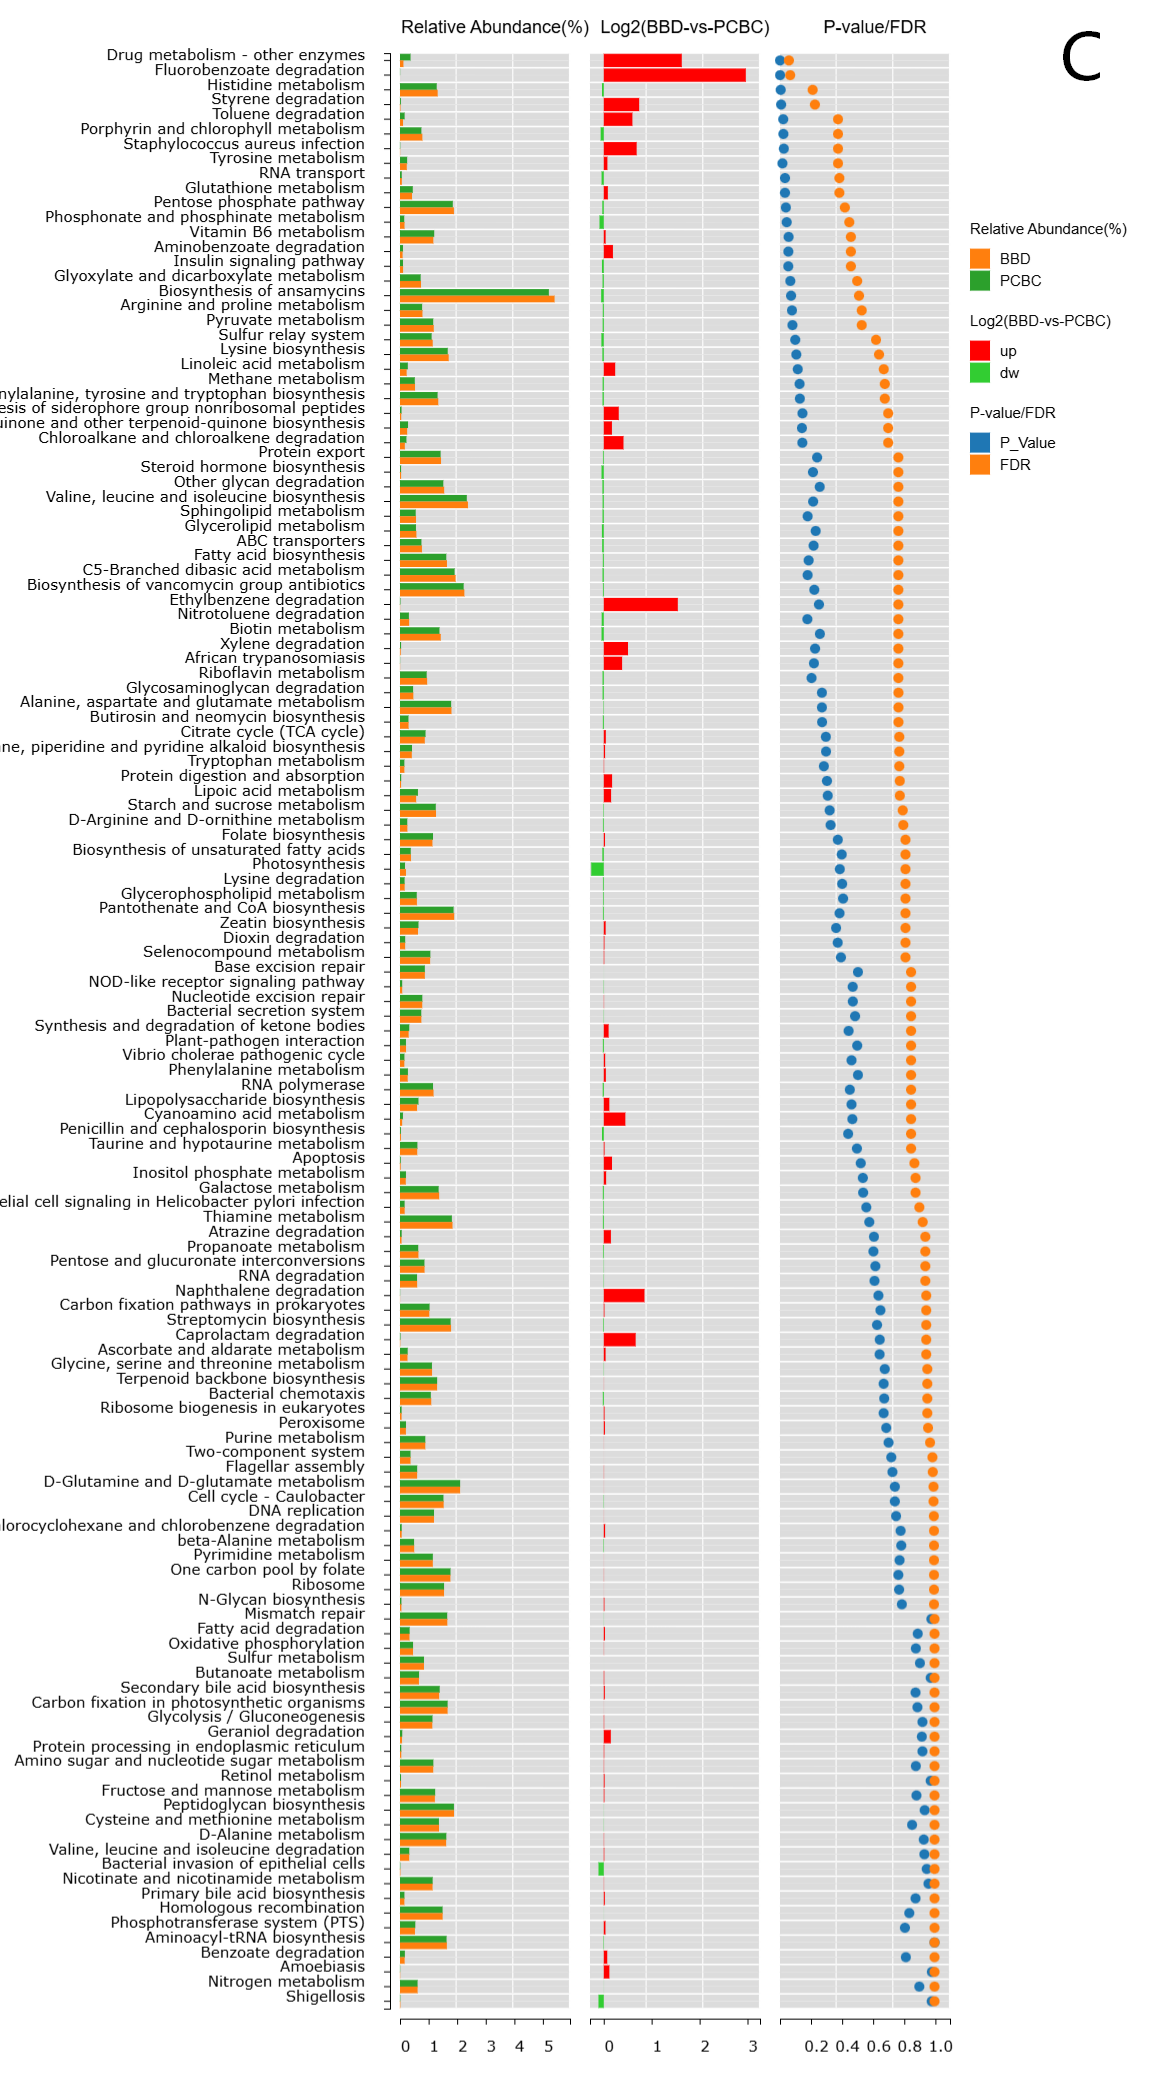


**Supplementary Figures 1A–C** (A) Differences in gut microbial functions between BBD and BC based on KEGG level 3 pathways. (B) Comparison of KEGG level 3 functional pathways before and after chemotherapy (BC vs. PCBC). (C) KEGG level 3 pathway differences between PCBC and BBD (Wilcoxon test, *P* < 0.05, **P* < 0.01).
